# Supplementary material for: Sanguisorba minor Scop.: An Overview of Its Phytochemistry and Biological Effects
Source: MDPI journal article supplement (doi:10.3390/plants12112128), 2023-05-27
Supplement: s1 [file s1]

## Materials and methods

### Plant material

*S. minor* Scop. was harvested in May 2022 in the Cluj country village of Bucea, Romania which is located between 46°96'30" N and 22°68'05" E. The leaves, stems, and roots of the plant were collected separately and transferred to containers where 20 ml ethyl alcohol was added. The identification of *S. minor* Scop. plants were made at the Department of Pharmaceutical Botany at the University of Oradea, Faculty of Medicine and Pharmacy. A specimen was kept in the Herbarium of the Faculty of Medicine and Pharmacy Oradea, Romania, registered in NYBG Steere Herbarium, under the code: Uop 05 367- *S. minor* Scop.

### Scanning Electron Microscopy (SEM) Analysis

The samples of *Sanguisorba minor* Scop. (roots, stems and leaves) were transported in sealed containers with ethyl alcohol, then transferred to Eppendorf tubes of 2 ml on 0.15 M phosphate buffer (PBS), for 1 hour, after that 2 washes were made with PBS 0.15M for 1 hour for each sample. After that, the samples were fixed with Hexamethyldisilazane reagent grade 99% from Sigma-Aldrich, for about 2 hours.

Dehydrating materials through fixation with Hexamethyldisilazane is also beneficial and essential for scanning analyses.

After that, they were mounted on brass supports (staves) with the help of self-adhesive carbon discs that allowed fixation and current conductivity. As a result, the Agar Sputter-Coater metallizer, the metallization of the samples was carried out, consisting in depositing a 10 nm layer of platinum on the surface of the samples, a process that helps in better reflection of electrons, resulting in a better image quality.

After metallization, the samples were examined using an image-capturing Hitachi SU8230 (Hitachi, Tokyo, Japan) scanning electron microscope operating at 30 kV. Images were taken of the samples allowed for the identification of the stomata, leaf surfaces, and roots.

**Table S1.** Biological activities of *Sanguisorba minor*

| Health effects   | Bioactive compounds                                                                | Sample type                                                                           | Type of experiment                                                  | Main Outcomes                                                                                                                                       | References |
|------------------|------------------------------------------------------------------------------------|---------------------------------------------------------------------------------------|---------------------------------------------------------------------|-----------------------------------------------------------------------------------------------------------------------------------------------------|------------|
| Anti-ulcerogenic | Saponins, tannins, flavonoids                                                      | Aqueous extract of aerial parts <i>S. minor</i>                                       | <i>In vivo</i> induced gastric ulcer model in rats (Sprague-Dawley) | - gastric protection against the ethanol-induced gastric ulcer model in rats                                                                        | [68]       |
| Nutritional      | Fatty acids ( $\alpha$ -linolenic acid, palmitic, linoleic acid, tricosylic acids) | mixture of chloroform, methanol, and water extract of aerial parts of <i>S. minor</i> | gas-liquid chromatography                                           | -high content of total fatty acids concentrations (22.2 g kg <sup>-1</sup> DM) and $\alpha$ -tocopherol concentrations (85 mg kg <sup>-1</sup> DM). | [86]       |

|                                      |                                     |                                                                                          |                                                                                                                                                                                                                                                                                                                                                                                                                                                     |                                                                                                                                                                                                                                                                                                                                                                                                              |      |
|--------------------------------------|-------------------------------------|------------------------------------------------------------------------------------------|-----------------------------------------------------------------------------------------------------------------------------------------------------------------------------------------------------------------------------------------------------------------------------------------------------------------------------------------------------------------------------------------------------------------------------------------------------|--------------------------------------------------------------------------------------------------------------------------------------------------------------------------------------------------------------------------------------------------------------------------------------------------------------------------------------------------------------------------------------------------------------|------|
| Nutritional and antioxidant activity | Organic acids<br>Phenolic compounds | Aqueous extract of leaves from <i>S. minor</i>                                           | <i>In vitro</i> test H-TAA, L-TAA, Hydroxyl radical (OH) and peroxy radical (H <sub>2</sub> O <sub>2</sub> ) scavenging                                                                                                                                                                                                                                                                                                                             | - the high value of H-TAA 368.91 ± 47.96 mg of Trolox equivalent 100 g <sup>-1</sup> FW,<br>-high total phenol levels (530.51 ± 21.12 mg 100 g <sup>-1</sup> FW),<br>-higher protector effect of DR against oxidative attack, with inhibition percentages of 57.75 ± 9.3% and best capacity for scavenging H <sub>2</sub> O <sub>2</sub> 64.35 ± 5.52%.                                                      | [56] |
| Neuroprotective                      | Flavonoids                          | Hydroethanolic extract aerial parts of <i>S. minor</i>                                   | <i>In vitro</i> Male Wistar rats-treatment with scopolamine                                                                                                                                                                                                                                                                                                                                                                                         | - antiacetylcholinesterase effect<br>-antioxidant activities in brain tissue,                                                                                                                                                                                                                                                                                                                                | [70] |
| Anticancer                           | Flavonoids                          | Ethanol extract of whole plant                                                           | <i>In vitro</i> scratch motility assay                                                                                                                                                                                                                                                                                                                                                                                                              | - limits plasmin-mediated tumor cell motility <i>in vitro</i> , mostly due to quercetin-3-glucuronide.                                                                                                                                                                                                                                                                                                       | [49] |
| Anticancer                           | Flavonoids                          | Maceration of aerial parts and roots of <i>S. minor</i><br>Methanol/water (80 : 20, v/v) | <i>In vivo</i> four human cancer cell lines: HeLa, HepG2, MCF-7 and NCI-H460, and PLP2.                                                                                                                                                                                                                                                                                                                                                             | - high inhibition of cell growth: HeLa (GI <sub>50</sub> = 60–75 µg mL <sup>-1</sup> ), MCF-7 (GI <sub>50</sub> = 81–199 µg mL <sup>-1</sup> ) and NCI-H460 cell lines (GI <sub>50</sub> = 130–199 µg mL <sup>-1</sup> ).                                                                                                                                                                                    | [28] |
| Antioxidant and antimicrobial        | Flavonoids<br>Tannins               | Leaves and roots of <i>S. minor</i><br>methanol/ water (80:20, v/v)                      | <i>In vitro</i> <i>Staphylococcus aureus</i> , <i>Bacillus cereus</i> , <i>Listeria monocytogenes</i> , <i>Pseudomonas aeruginosa</i> , <i>Escherichia coli</i> , <i>Enterobacter cloacae</i> , <i>Salmonella typhimurium</i> , <i>Aspergillus fumigatus</i> , <i>Aspergillus niger</i> , <i>Aspergillus ochraceus</i> , <i>Penicillium ochrochloron</i> , <i>Penicillium funiculosum</i> , and <i>Penicillium verrucosum</i> var. <i>cyclopium</i> | -the roots extract revealed a higher antibacterial capacity in comparison with leaves, especially against <i>S. aureus</i> , <i>B. cereus</i> , <i>L. monocytogenes</i> , and <i>S. typhimurium</i><br>-the roots extract contained a higher amounts of total phenolic acids (27.7 mg/g), total hydrolysable tannins (127.53 mg/g), total flavonoids (64.6 mg/g) and total phenolic compounds (219.81 mg/g). | [55] |
| Antioxidant                          | Phenolic compounds                  | Ethanol extract of roots, leaves and stems of <i>S. minor</i>                            | <i>In vitro</i> DPPH, FRAP, Folin Ciocalteu                                                                                                                                                                                                                                                                                                                                                                                                         | -ethanolic roots extract exhibited high levels of DPPH radical neutralization (92.93% of inhibition), respectively                                                                                                                                                                                                                                                                                           | [4]  |

|                                                                                                                                                                                                                                                                                                                                                                                                                                                                                                                                              |                                         |                                                                                                       |                                                                                               |                                                                                                                                                                                                                           |      |
|----------------------------------------------------------------------------------------------------------------------------------------------------------------------------------------------------------------------------------------------------------------------------------------------------------------------------------------------------------------------------------------------------------------------------------------------------------------------------------------------------------------------------------------------|-----------------------------------------|-------------------------------------------------------------------------------------------------------|-----------------------------------------------------------------------------------------------|---------------------------------------------------------------------------------------------------------------------------------------------------------------------------------------------------------------------------|------|
|                                                                                                                                                                                                                                                                                                                                                                                                                                                                                                                                              |                                         |                                                                                                       |                                                                                               | 3.89 mg GAE/mL by the Folin Ciocalteu and 10.81 μmol TE/g by FRAP method.                                                                                                                                                 |      |
| Antimicrobial                                                                                                                                                                                                                                                                                                                                                                                                                                                                                                                                | Tannins<br>Flavonoids<br>Phenolic acids | Ethanol extract of roots, leaves and flowers of <i>S. minor</i>                                       | <i>In vitro Staphylococcus aureus, Escherichia coli, Pseudomonas aeruginosa</i>               | -the ethanol extract of <i>S. minor</i> Scop. leaves exhibited better antibacterial activity against all of the bacteria tested, especially on <i>Staphylococcus aureus</i> , with an inhibition zone of 15.33 ± 0.83 mm. | [44] |
|                                                                                                                                                                                                                                                                                                                                                                                                                                                                                                                                              | Phenolic compounds                      | Maceration of aerial parts of <i>S. minor</i> methanol/water (80 : 20, v/v)                           | <i>In vitro B. cereus, L. monocytogenes, E. coli, S. typhimurium, En. cloacae, S. aureus.</i> | - <i>S. minor</i> Scop. roots extracts exhibited the ability to inhibit the growth of <i>B. cereus, En. cloacae, L. monocytogenes, S. aureus, and S. typhimurium</i> , at concentrations of 0.075 mg mL <sup>-1</sup> .   | [28] |
| Neuroprotective and antioxidant                                                                                                                                                                                                                                                                                                                                                                                                                                                                                                              | Phenolic compounds                      | Three extracts: ethanolic extract, water extract and essential oil of aerial parts of <i>S. minor</i> | DPPH, enzymatic activity                                                                      | -high inhibition value of AChE in the ethanolic (78%) at 1mg/ml.<br>- all three extracts showed antioxidant activity, but ethanolic extract and decoction have the highest value (93%).                                   | [65] |
| DM- Dry matter, H-TAA- hydrophilic antioxidant activities, L-TAA- lipophilic antioxidant activity, FW- fresh weight, DR-deoxyribose, LC-MS- reversed-phase coupled to high-resolution mass spectrometry, HeLa- cervical carcinoma, HepG2- hepatocellular carcinoma, MCF-7- breast adenocarcinoma, NCI-H460- non-small cell lung cancer, PLP2- porcine liver cell primary culture, GI <sub>50</sub> - extract concentration that inhibited 50% net cell growth, GAE-gallic acid equivalent, TE-Trolox Equivalent, AChE –acetylcholinesterase. |                                         |                                                                                                       |                                                                                               |                                                                                                                                                                                                                           |      |
